# Supplementary material for: Gismondine cobalt phosphate (CoPO4) as a monovalent-ion battery cathode material: a first-principles study
Source: Royal Society of Chemistry journal article supplement (doi:10.1039/c6ta10674a), 2017-01-01
Supplement: c6ta10674a1.pdf [file c6ta10674a1.pdf]

Electronic Supplementary Information

# Gismondine Cobalt Phosphate ( $\text{CoPO}_4$ ) as Monovalent-ion Battery Cathode Material: A First-Principles Study

*Pei Shan Emmeline Yeo<sup>1</sup> and Man-Fai Ng<sup>\*1</sup>*

## 1.1 Characteristics of Pure $\text{CoPO}_4$ (C2/c)

**Table S1** shows the experimental lattice parameters of  $\text{CoPO}_4$  (C2/c) as compared to the ones calculated using *VASP* with the (1) generalized gradient approximation (GGA) and (2) GGA with Hubbard correction (GGA+U) exchange-correlation functionals. Our calculated values are similar to experimental ones. Although pure  $\text{CoPO}_4$  (C2/c) is predicted to be a semiconductor with a 1.1 eV bandgap under GGA+U, it is predicted to be metallic with no bandgap under GGA (see **Figure S1**).

---

<sup>1</sup>*Institute of High Performance Computing, Agency for Science, Technology and Research, 1 Fusionopolis Way, #16-16 Connexis, Singapore 138632*

*\* E-mail: ngmf@ihpc.a-star.edu.sg*

**Table S1.** Comparison of the experimental<sup>1</sup> and our calculated lattice parameters of CoPO<sub>4</sub> (C2/c).

|                | a (Å)  | b (Å) | c (Å)  | β (°)   | Volume (Å <sup>3</sup> ) |
|----------------|--------|-------|--------|---------|--------------------------|
| Expt. lattice  | 14.744 | 8.850 | 10.062 | 131.609 | 981.7                    |
| GGA lattice    | 14.499 | 9.201 | 10.125 | 134.294 | 966.8                    |
| % diff fr Expt | -1.7   | 4.0   | 0.6    | 2.0     | -1.5                     |
| GGA+U lattice  | 14.768 | 8.879 | 10.360 | 135.619 | 950.1                    |
| % diff fr Expt | 0.2    | 0.3   | 3.0    | 3.0     | -3.2                     |

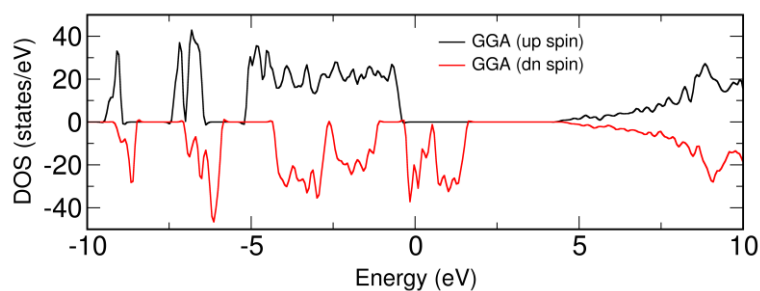

**Figure S1.** DOS of pure CoPO<sub>4</sub> (C2/c) calculated using the GGA exchange-correlation functional.

## 1.2 Variations of the Repeating Unit in CoPO<sub>4</sub> (C2/c)

The volume of CoPO<sub>4</sub> (C2/c) shrinks on increasing lithiation/sodiation. **Table S2** shows how much the diameters of ring<sub>Co</sub> and ring<sub>p</sub>, as well as the widths of cradle<sub>Co</sub> and cradle<sub>P</sub>, change as Li/Na atoms are adsorbed onto the CoPO<sub>4</sub> (C2/c) framework. The CoPO<sub>4</sub> (C2/c) framework shrinks more to accommodate the smaller Li atoms.

**Table S2.** Measurements of the repeating unit of pure  $\text{CoPO}_4$  (C2/c),  $\text{CoPO}_4$  with 8 Li atoms adsorbed in the framework, and  $\text{CoPO}_4$  with 8 Na atoms adsorbed in the framework.

|                               | Pure<br>$\text{CoPO}_4$ | $\text{CoPO}_4 + 8$<br>Li | $\text{CoPO}_4 + 8$<br>Na |
|-------------------------------|-------------------------|---------------------------|---------------------------|
| Aver. diameter<br>ring_P (Å)  | 5.00                    | 3.65                      | 4.25                      |
| Aver. diameter<br>ring_Co (Å) | 5.20                    | 3.37                      | 3.88                      |
| Aver. width<br>cradle_P (Å)   | 4.71                    | 4.36                      | 4.93                      |
| Aver. width<br>cradle_Co (Å)  | 5.33                    | 3.86                      | 4.32                      |

### 1.3 Diffusion Routes for Li

**Figure S2** shows the diffusion routes taken by Li as it moves from various adsorption sites to another.

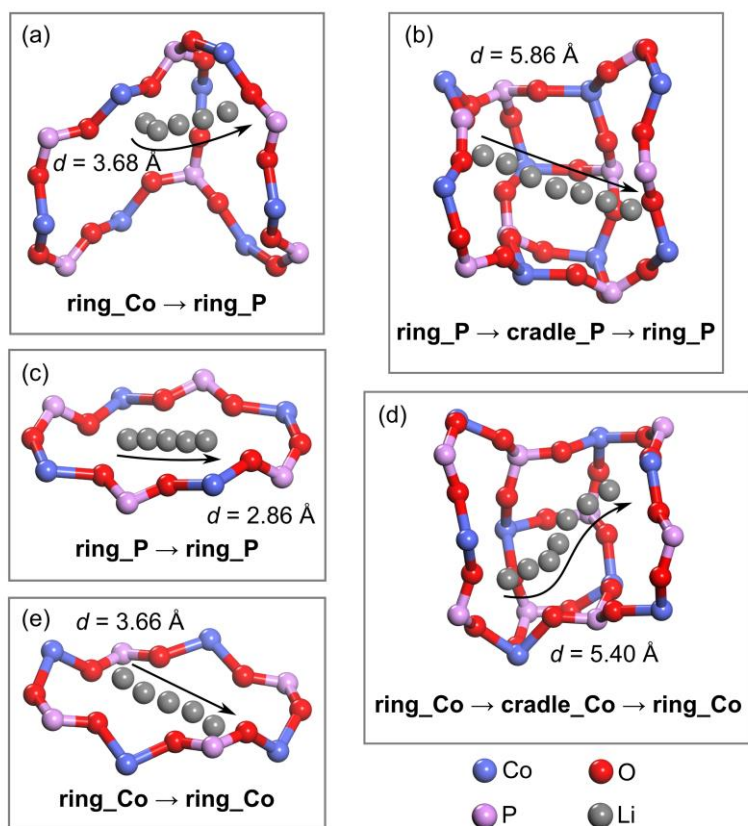

**Figure S2.** (a-e) Molecular models showing the actual route and distance,  $d$ , taken by Li as it diffuses between different adsorption sites. The Li atom from each geometry-optimized image of the CI-NEB calculations was superimposed onto the pure CoPO<sub>4</sub> (C2/c) unit cell; all other atoms in the CoPO<sub>4</sub> (C2/c) unit cell have been removed for visual clarity.

#### 1.4 Ab Initio Molecular Dynamics Results

We conducted ab initio molecular dynamics (MD) calculations to observe the actual preferred diffusion pathways of Li/Na within the CoPO<sub>4</sub> (C2/c) channels. The generalized gradient approximation (GGA) exchange-correlation functional was used. We placed 4 Li/Na atoms in random positions in a  $1 \times 2 \times 2$  supercell and equilibrated the supercell for 2 picoseconds (ps) at 800 K under the canonical (NVT) ensemble using the Nosé-Hoover thermostat.<sup>2</sup> A time step of 1 femtosecond (fs) was used. After equilibration, an NVT production run of 6 ps was conducted and the trajectories of the atoms were saved every 50 fs. The temperature of 800 K was chosen so that we could observe significant diffusion of Li/Na under a reasonable simulation timeframe.<sup>3</sup>

**Figure S3** shows the diffusion of Li and Na atoms in CoPO<sub>4</sub> (C2/c) during the 6 ps ab initio MD simulation at 800 K. The framework was stable during the simulation and no phase transitions were observed. The MD trajectories coincide with our proposed pathways: we observe that pathways 1 and 2 are the most favored by Li while pathway 1 is the most favored by Na; pathway 3 is not less favored by Li or Na.

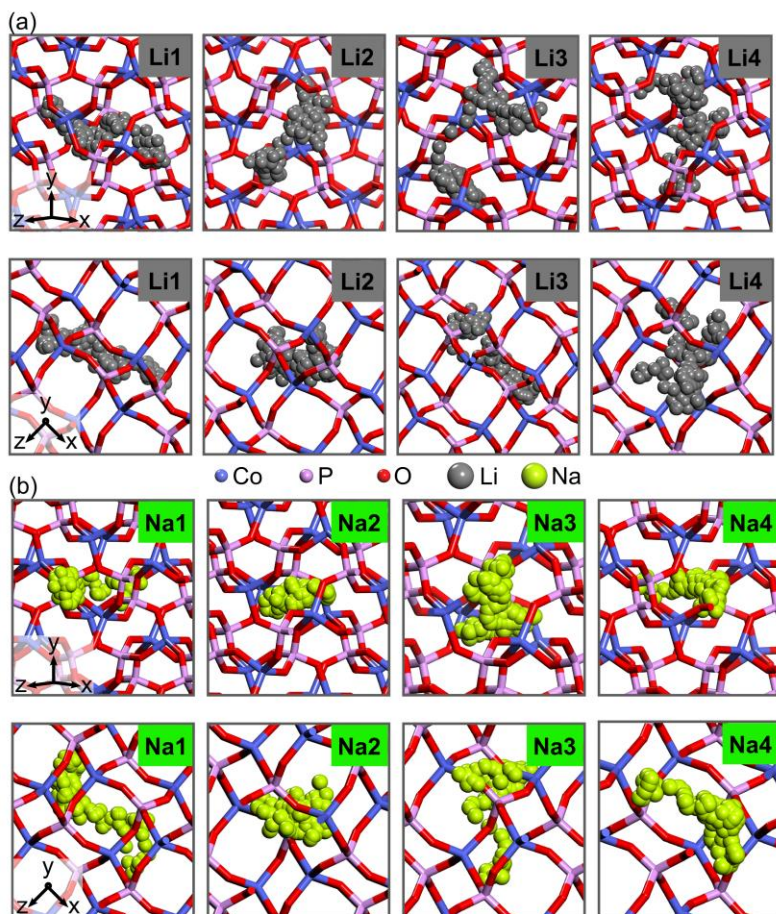

**Figure S3.** Molecular models showing, from two different perspectives, the trajectories of (a) four Li atoms and (b) four Na atoms in a  $1 \times 2 \times 2$   $\text{CoPO}_4$  (C2/c) supercell during a 6 ps ab-initio molecular dynamics simulation at 800 K. Each sphere represents the spatial coordinates of each Na atom captured at every 50-fs interval of the 6 ps simulation. For visual clarity, we did not show the movement of the atoms in the  $\text{CoPO}_4$  (C2/c) supercell.

## References

- 1 Yuan, H.-M.; Chen, J.-S.; Zhu, G.-S.; Li, J.-Y.; Yu, J.-H.; Yang, G.-D.; Xu, R.-R. *Inorg. Chem.*, 2000, **39**, 1476–1479.
- 2 Nosé, S. *J. Chem. Phys.*, 1984, **81**, 511–519.
- 3 Wang, Y.; Richards, W. D.; Ong, S. P.; Miara, L. J.; Kim, J. C.; Mo, Y.; Ceder, G. *Nat. Mater.*, 2015, **14**, 1026–1031.
